# Supplementary material for: Development and Validation of Liquid Chromatography-Tandem Mass Spectrometry Method for Pharmacokinetic Evaluation of 7β-(3-Ethyl-cis-crotonoyloxy)-1α-(2-methylbutyryloxy)-3,14-dehydro-Z-notonipetranon in Rats
Source: PubMed Central journal article supplement (PMC7221868; doi:10.3390/molecules25081774), 2020-04-13
Supplement: molecules-25-01774-s001.pdf [file molecules-25-01774-s001.pdf]

## Supplementary Information

# Development and Validation of Liquid Chromatography-Tandem Mass Spectrometry Method for Pharmacokinetic Evaluation of 7 $\beta$ -(3-Ethyl-cis-crotonoyloxy)-1 $\alpha$ -(2-methylbutyryloxy)-3,14-dehydro-Z-notonipetranon in Rats

Nae-Won Kang <sup>1,†</sup>, Jae-Young Lee <sup>2,†</sup>, Kwangho Song <sup>3</sup>, Min-Hwan Kim <sup>1</sup>, Soyeon Yoon <sup>1</sup> and Duy-Thuc Nguyen <sup>1</sup>, Sungho Kim <sup>1</sup>, Yeong Shik Kim <sup>3</sup> and Dae-Duk Kim <sup>1,\*</sup>

<sup>1</sup> College of Pharmacy and Research Institute of Pharmaceutical Sciences, Seoul National University, Seoul 08826, Republic of Korea

<sup>2</sup> College of Pharmacy, Chungnam National University, Daejeon 34134, Republic of Korea

<sup>3</sup> Natural Products Research Institute, College of Pharmacy, Seoul National University, Seoul 08826, South Korea

\* Correspondence: ddkim@snu.ac.kr; Tel.: +82 2 880 7870; fax: +82 2 873 9177

† These authors have equally contributed.

**Table 1.** Optimization of ionization source settings.

| <b>Condition No.</b> | <b>Nebulizer pressure (psi)</b> | <b>Gas temperature (°C)</b> | <b>Capillary voltage (kV)</b> | <b>Change in peak area by fold<sup>a</sup></b> |
|----------------------|---------------------------------|-----------------------------|-------------------------------|------------------------------------------------|
| 1                    | 15                              | 300                         | 4                             | 1.00                                           |
| 2                    | 15                              | 310                         | 4                             | 1.06                                           |
| 3                    | 15                              | 320                         | 4                             | 1.13                                           |
| 4                    | 15                              | 330                         | 4                             | 1.24                                           |
| 5                    | 15                              | 340                         | 4                             | 1.21                                           |
| 6                    | 15                              | 350                         | 4                             | 1.29                                           |
| <b>7</b>             | <b>30</b>                       | <b>350</b>                  | <b>4</b>                      | <b>1.67</b>                                    |
| 8                    | 50                              | 350                         | 4                             | 1.64                                           |
| 9                    | 60                              | 350                         | 4                             | 1.63                                           |
| 10                   | 30                              | 350                         | 5                             | 1.59                                           |
| 11                   | 30                              | 350                         | 6                             | 1.58                                           |

<sup>a</sup> Compared to condition No. 1.**Table 2.** Optimization of mobile phase composition.

| <b>Condition No.</b> | <b>ACN (%)</b> | <b>Change in peak area by fold<sup>a</sup></b> |
|----------------------|----------------|------------------------------------------------|
| 1                    | 15             | 1.00                                           |
| 2                    | 14             | 1.03                                           |
| 3                    | 13             | 1.06                                           |
| 4                    | 12             | 1.18                                           |
| <b>5</b>             | <b>11</b>      | <b>1.23</b>                                    |
| 6                    | 10             | 1.20                                           |
| 7                    | 9              | 1.19                                           |
| 8                    | 8              | 1.19                                           |
| 9                    | 7              | 1.14                                           |
| 10                   | 6              | 1.06                                           |
| 11                   | 5              | 0.97                                           |

<sup>a</sup> Compared to condition No. 1.**Table 3.** ECN stability at room temperature over 90 min.

| <b>Nominal concentration (ng/mL)</b> | <b>Mean</b> | <b>RSD (%)</b> | <b>RE (%)</b> |
|--------------------------------------|-------------|----------------|---------------|
| 10.0                                 | 7.11        | 15.6           | -28.9         |
| 25.0                                 | 18.8        | 2.90           | -25.0         |
| 3750                                 | 2776        | 1.52           | -26.0         |
| 7500                                 | 5588        | 0.30           | -25.5         |

**Table 4.** Precision and accuracy of sample dilution method.

| <b>Nominal concentration (ng/mL)</b> | <b>Mean</b> | <b>RSD (%)</b> | <b>RE (%)</b> |
|--------------------------------------|-------------|----------------|---------------|
| 20000                                | 21300       | 3.26           | 6.52          |
| 50000                                | 56870       | 0.885          | 13.7          |
